# Supplementary material for: Early detection and analysis of accurate breast cancer for improved diagnosis using deep supervised learning for enhanced patient outcomes
Source: PeerJ journal article supplement (doi:10.7717/peerj-cs.2784), 2025-04-24
Supplement: Supplementary_Figure_2.pdf [file Supplementary_Figure_2.pdf]

# Data Pre-Processing

```
graph TD; A[Data Pre-Processing] --> B[Cleaning and Normalization]; A --> C[Feature Selection]; B --> D[Handling Missing values]; B --> E[Removing duplicates]; B --> F[Correcting Inconsistencies]; B --> G[Normalization]; C --> H[Filter Methods]; C --> I[Wrapper methods]; C --> J[Embedded methods];
```

## Cleaning and Normalization

**Handling Missing values**

**Removing duplicates**

**Correcting Inconsistencies**

**Normalization**

## Feature Selection

**Filter Methods**

**Wrapper methods**

**Embedded methods**
